# Supplementary material
Source: MDPI journal article supplement (https://www.mdpi.com/2076-3271/11/1/18)
Supplement: s1 [file s1]

Table S1. Clinicopathological characteristics of patients.

| Clinicopathological variables         | Number of patients<br>N |
|---------------------------------------|-------------------------|
| Mode of presentation (n=9)            |                         |
| Non-incidental                        | 2                       |
| Incidental                            | 7                       |
| Presenting symptoms (n=9)             |                         |
| Asymptomatic                          | 1                       |
| Postmenopausal bleeding               | 1                       |
| Abdominal distension                  | 1                       |
| Abdominal pain                        | 2                       |
| Urinary incontinence                  | 1                       |
| Abnormal uterine bleeding             | 1                       |
| Recurrent urinary tract infections    | 1                       |
| Abdominal pain and distension         | 1                       |
| Indication of surgery (n=9)           |                         |
| Bilateral ovarian cysts on imaging    | 1                       |
| Prophylactic surgery (BRCA 1 carrier) | 1                       |
| Adnexal mass                          | 5                       |
| Cervical prolapse                     | 1                       |
| Endometrial hyperplasia and fibroids  | 1                       |
| Type of surgery (n=9)                 |                         |
| BSO + Hysteroscopic polypectomy       | 1                       |
| BSO                                   | 1                       |
| TAH + BSO                             | 3                       |
| Exploratory laparotomy + TAH + BSO    | 1                       |
| TVH + BSO                             | 1                       |
| Robotic right oophorectomy            | 1                       |
| TAH + BSO and appendectomy            | 1                       |
| Laterality (n=9)                      |                         |
| Right                                 | 6                       |
| Left                                  | 2                       |
| Right and left                        | 1                       |
| Histologic type (n=9)                 |                         |
| Benign                                | 9                       |
| Borderline                            | 0                       |

|                               |   |
|-------------------------------|---|
| Malignant                     | 0 |
| Other findings (n=9)          |   |
| Mucinous cystadenoma          | 2 |
| Leiomyomata uteri             | 3 |
| Corpus luteum cyst            | 1 |
| Endometrial polyp             | 2 |
| Walthard rests (n=9)          |   |
| Present                       | 6 |
| Absent                        | 3 |
| Transitional metaplasia (n=9) |   |
| Present                       | 4 |
| Absent                        | 5 |

Abbreviations: BSO: Bilateral salpingo-oophorectomy; TAH: Total abdominal hysterectomy; TVH: Total vaginal hysterectomy
